# Supplementary material for: Telomere length associates with chronological age and mortality across racially diverse pulmonary fibrosis cohorts
Source: Springer Nature journal article supplement (doi:10.1038/s41467-023-37193-6), 2023-03-17
Supplement: MOESM1 [file 41467_2023_37193_MOESM1_ESM.pdf]

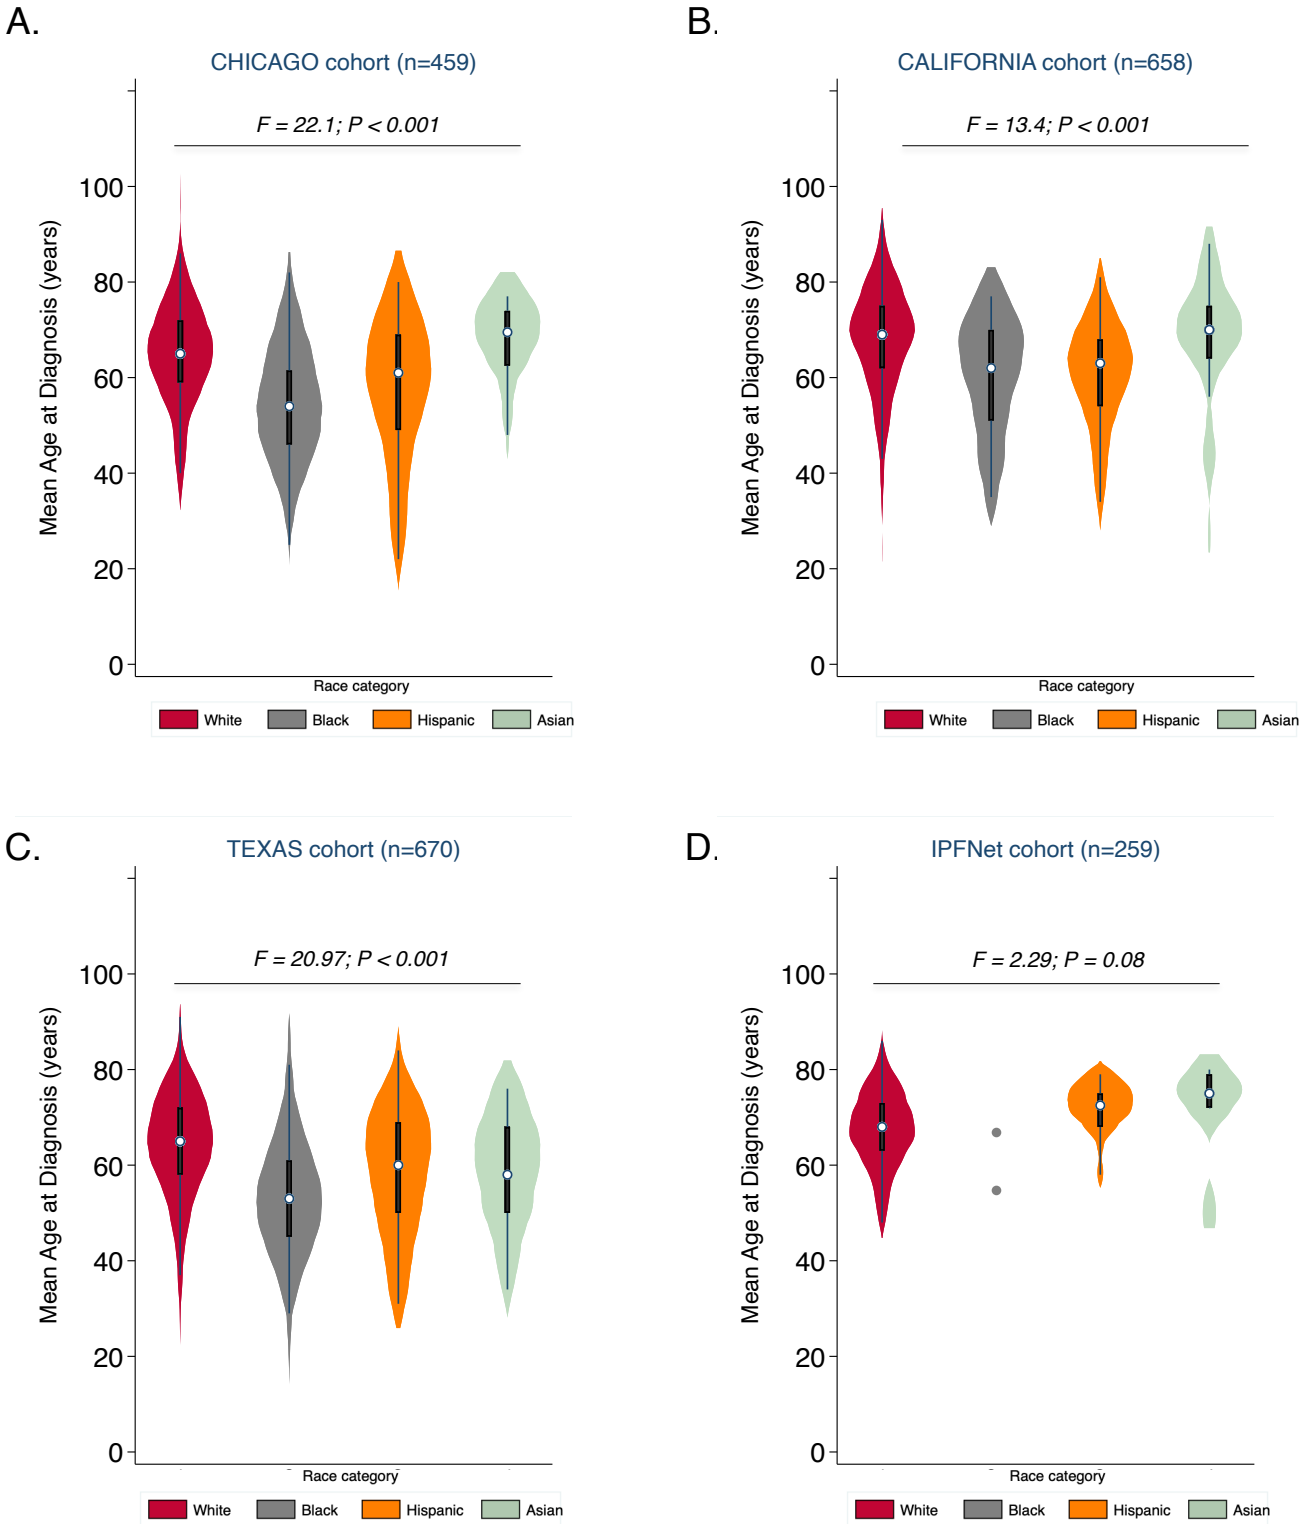

**Supplementary Figure 1. Mean age at diagnosis of pulmonary fibrosis is lowest among Black subjects.** Stratification by racial subgroup depicts (A) The CHICAGO cohort (n=459, White red, n=332; Black grey, n=84; Hispanic orange, n=35; and Asian green, n=8); (B) The CALIFORNIA cohort (n=646, White red, n=517; Black grey, n=21; Hispanic orange, n=70; and Asian green, n=36); (C) The TEXAS cohort (n=670, White red, n=528; Black grey, n=55; Hispanic orange, n=68; and Asian green, n=19); and (D) The IPFNet cohort (n=259, White red, n=236; Black grey, n=2; Hispanic orange, n=14; and Asian green, n=7). Group comparisons across racial subgroups conducted using Bartlett's one-way analysis of variance (ANOVA) test. In the violin plots, the white circle represents the median of the data; the black vertical box indicates the interquartile range; the thin blue vertical line indicates 1.5x the interquartile range and the density curves depicts the distribution of numeric data for all sample points within each group.

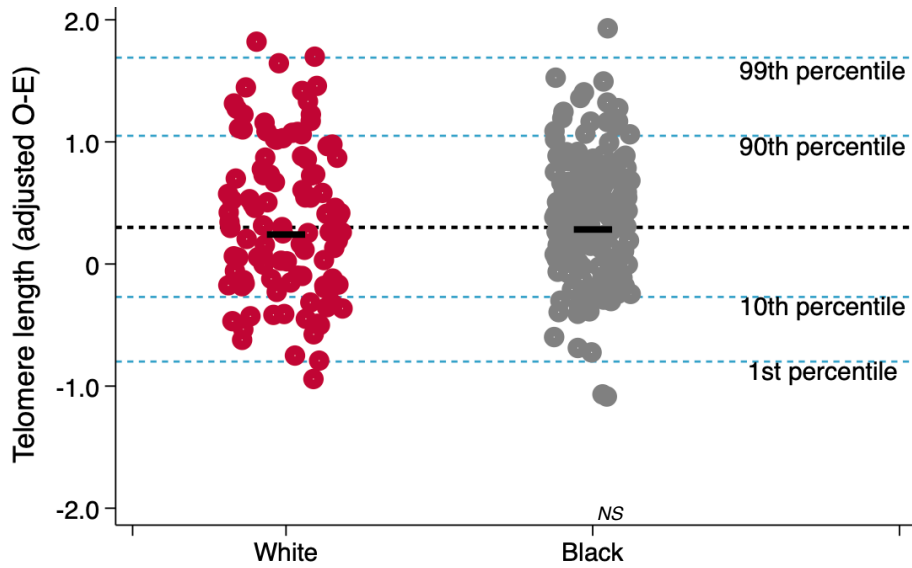

**Supplementary Figure 2. Mean observed minus expected (O-E; age and gender-adjusted) leukocyte telomere length (TL) is similar in White subjects propensity-matched to Black subjects with pulmonary fibrosis (PF).** Mean age and gender-adjusted TL (O-E) of 0.33 (0.56) in White subjects (n=106), and 0.37 (0.49) in Black subjects (n=162), respectively. Thick short black lines show the median for each subgroup. The black dotted line shows the median TL; blue dotted lines show approximate age-adjusted prediction bands in percentiles for each cohort. *Group comparisons between white subjects (#) and other racial subgroups conducted using the two-sided student's T-test; NS=not significant ( $P \geq 0.05$ ).*

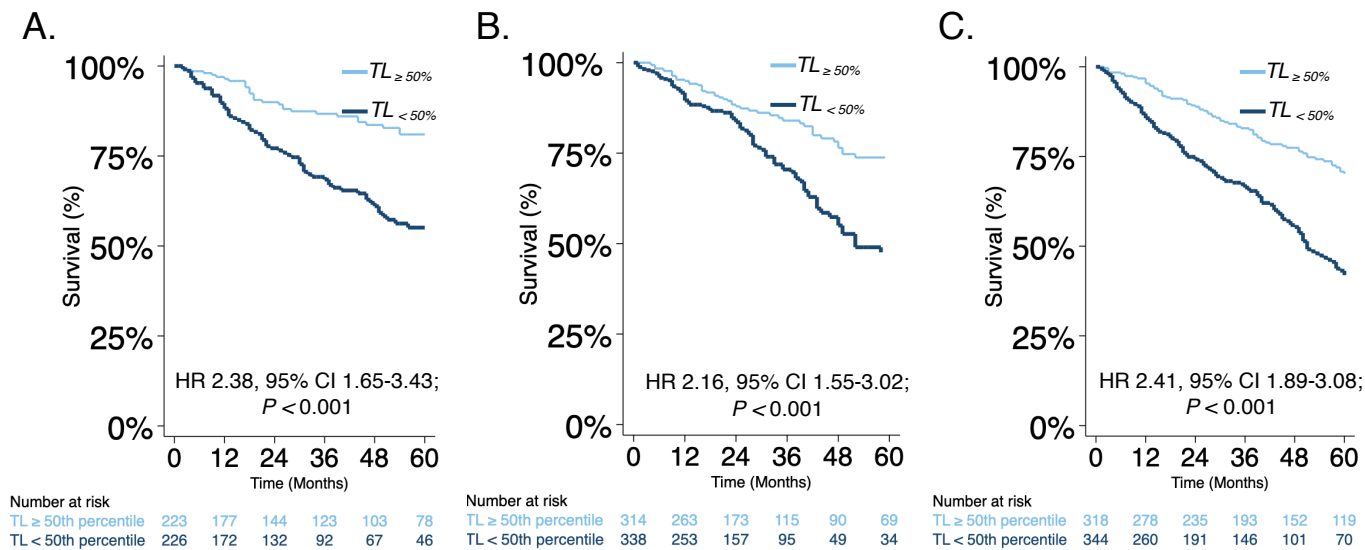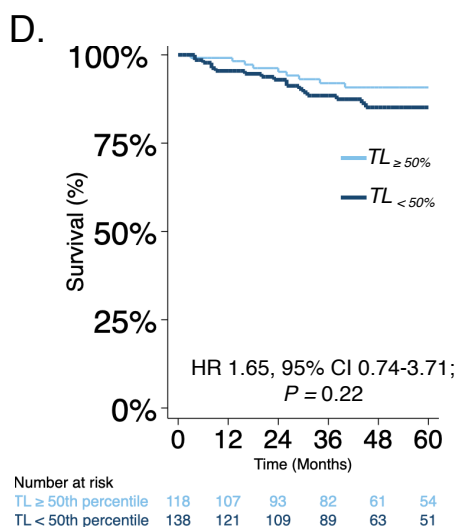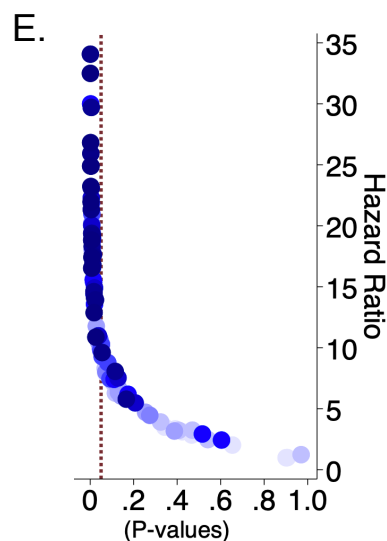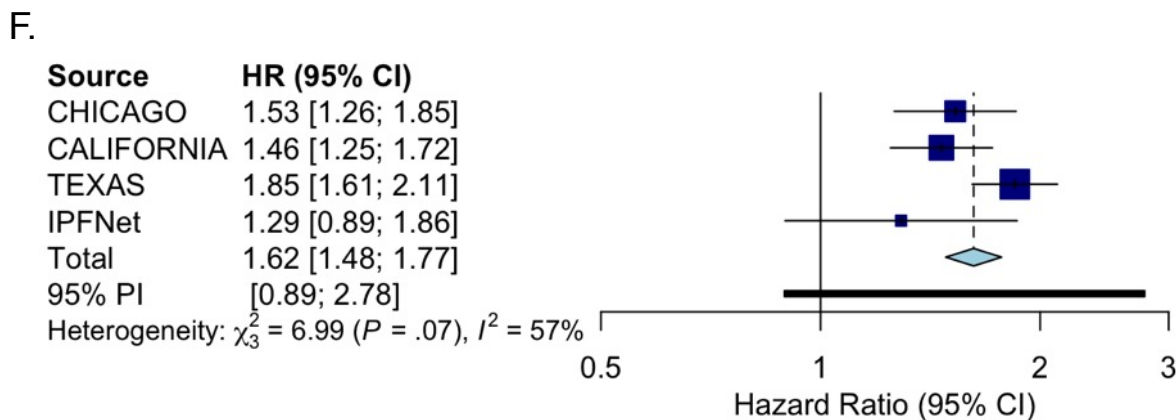

**Supplementary Figure 3.** Shorter leukocyte telomere length (TL) consistently predicts worse survival patterns in pulmonary fibrosis. Survival stratified by age and gender-adjusted TL below the median ( $TL_{<50\%}$ ) vs. above the median ( $TL_{\geq 50\%}$ ) in **(A)** University of Chicago (CHICAGO) cohort ; **(B)** University of California, Davis and University of California, San Francisco (CALIFORNIA) cohort; **(C)** University of Texas, Southwestern (UTSW) cohort; **(D)** Idiopathic Pulmonary Fibrosis Network Clinical Trials (IPFNet) cohort. Unadjusted Cox proportional hazard ratio (HR) and 95% confidence interval of this mortality hazard estimate depicted with its respective P-value for each cohort. **(E)** Plot of p-values for the association of mortality hazard ratios (HR) in PF with transformed TL (negative log-transformed inverse of one minus percentile TL); HR depicted for decreasing centiles of TL compared to highest centile of TL. **(F)** Survival stratified by age and gender-adjusted TL in quartiles for each center; CHICAGO (n=459), CALIFORNIA (n=658), TEXAS (n=670), IPFNET (n=259); TOTAL (n=2046). The navy blue boxes within the forest plot represents the point estimate for the mortality hazard ratio for each cohort, the thin horizontal line represents its 95% confidence interval, the vertical line is the line of no effect, and the diamond represents the overall effect estimate.

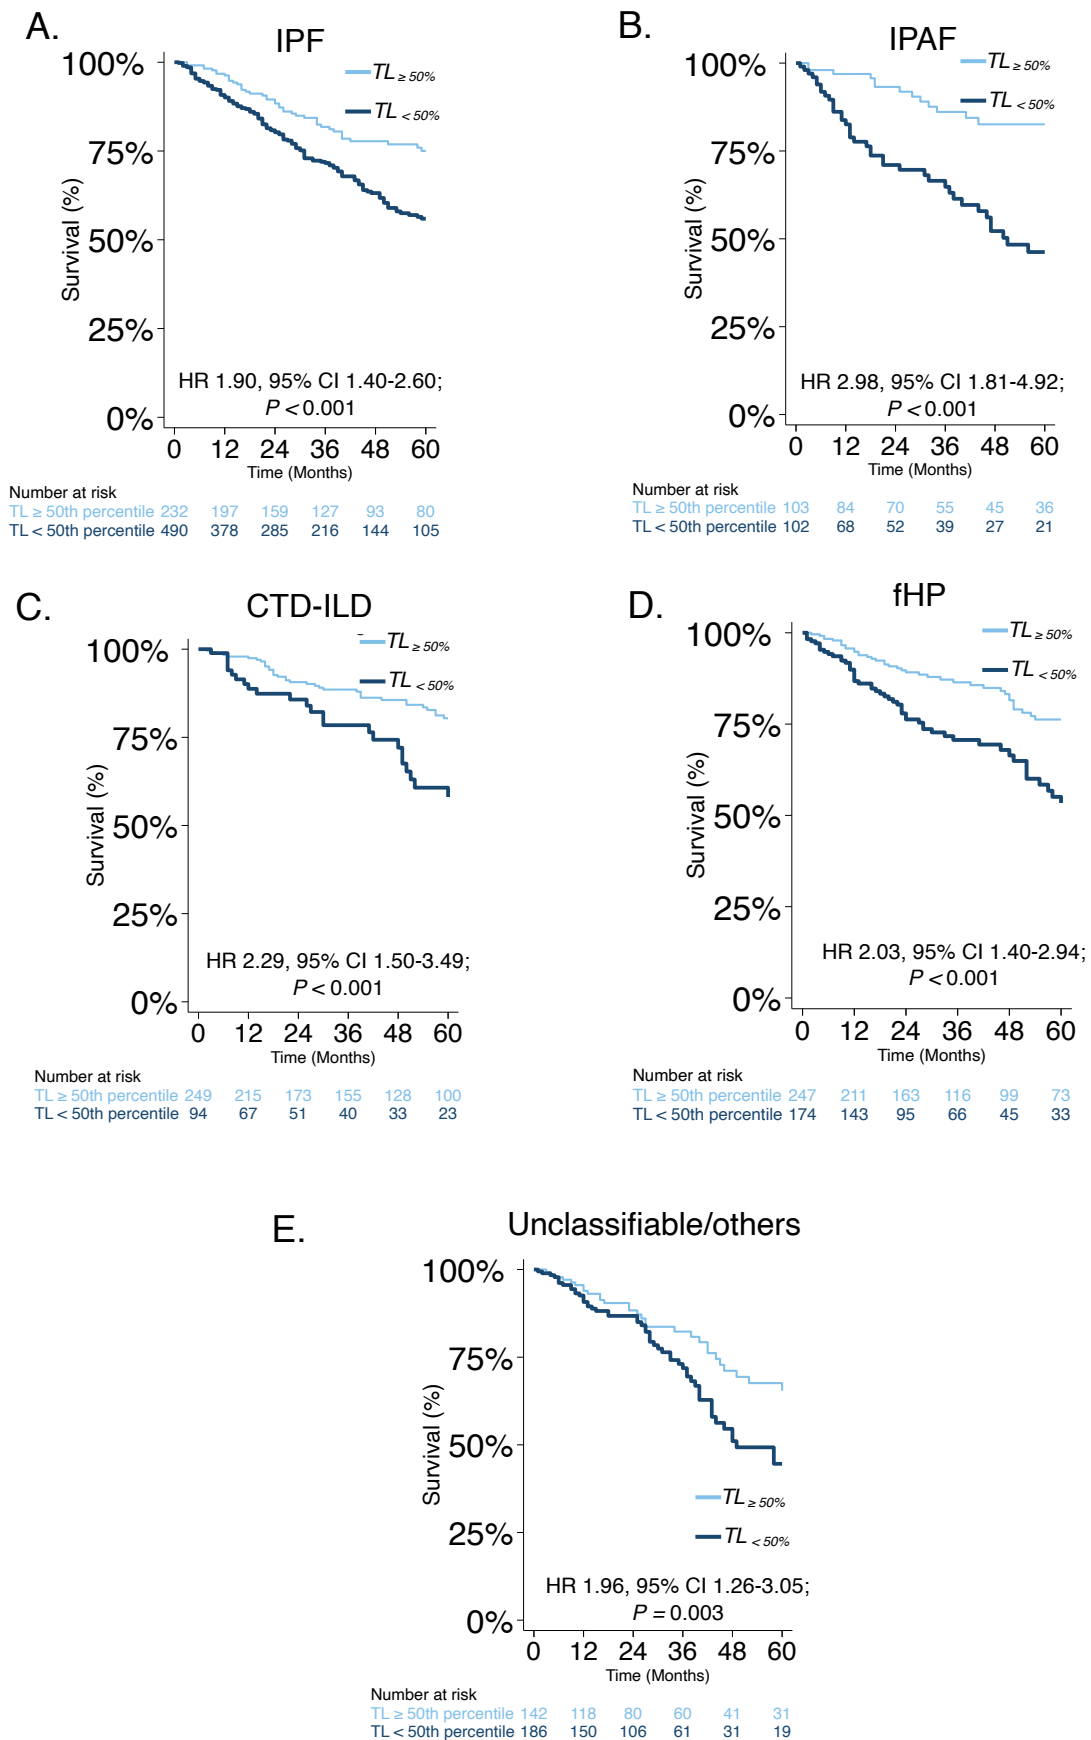

**Supplementary Figure 4.** Shorter leukocyte telomere length (TL) consistently predicts worse survival patterns in pulmonary fibrosis (PF) subtypes. Survival stratified by age and gender-adjusted TL below the median ( $TL_{<50\%}$ ) vs. above the median ( $TL_{\geq 50\%}$ ) in (A) idiopathic pulmonary fibrosis (IPF); (B) interstitial pneumonia with autoimmune features (IPAF); (C) connective tissue disease-related interstitial lung disease (CTD-ILD); (D) fibrotic hypersensitivity pneumonitis (fHP) (E) unclassifiable or other PF subtypes. Unadjusted Cox proportional hazard ratio (HR) and 95% confidence interval of this mortality hazard estimate depicted with its respective P-value for each PF subtype.

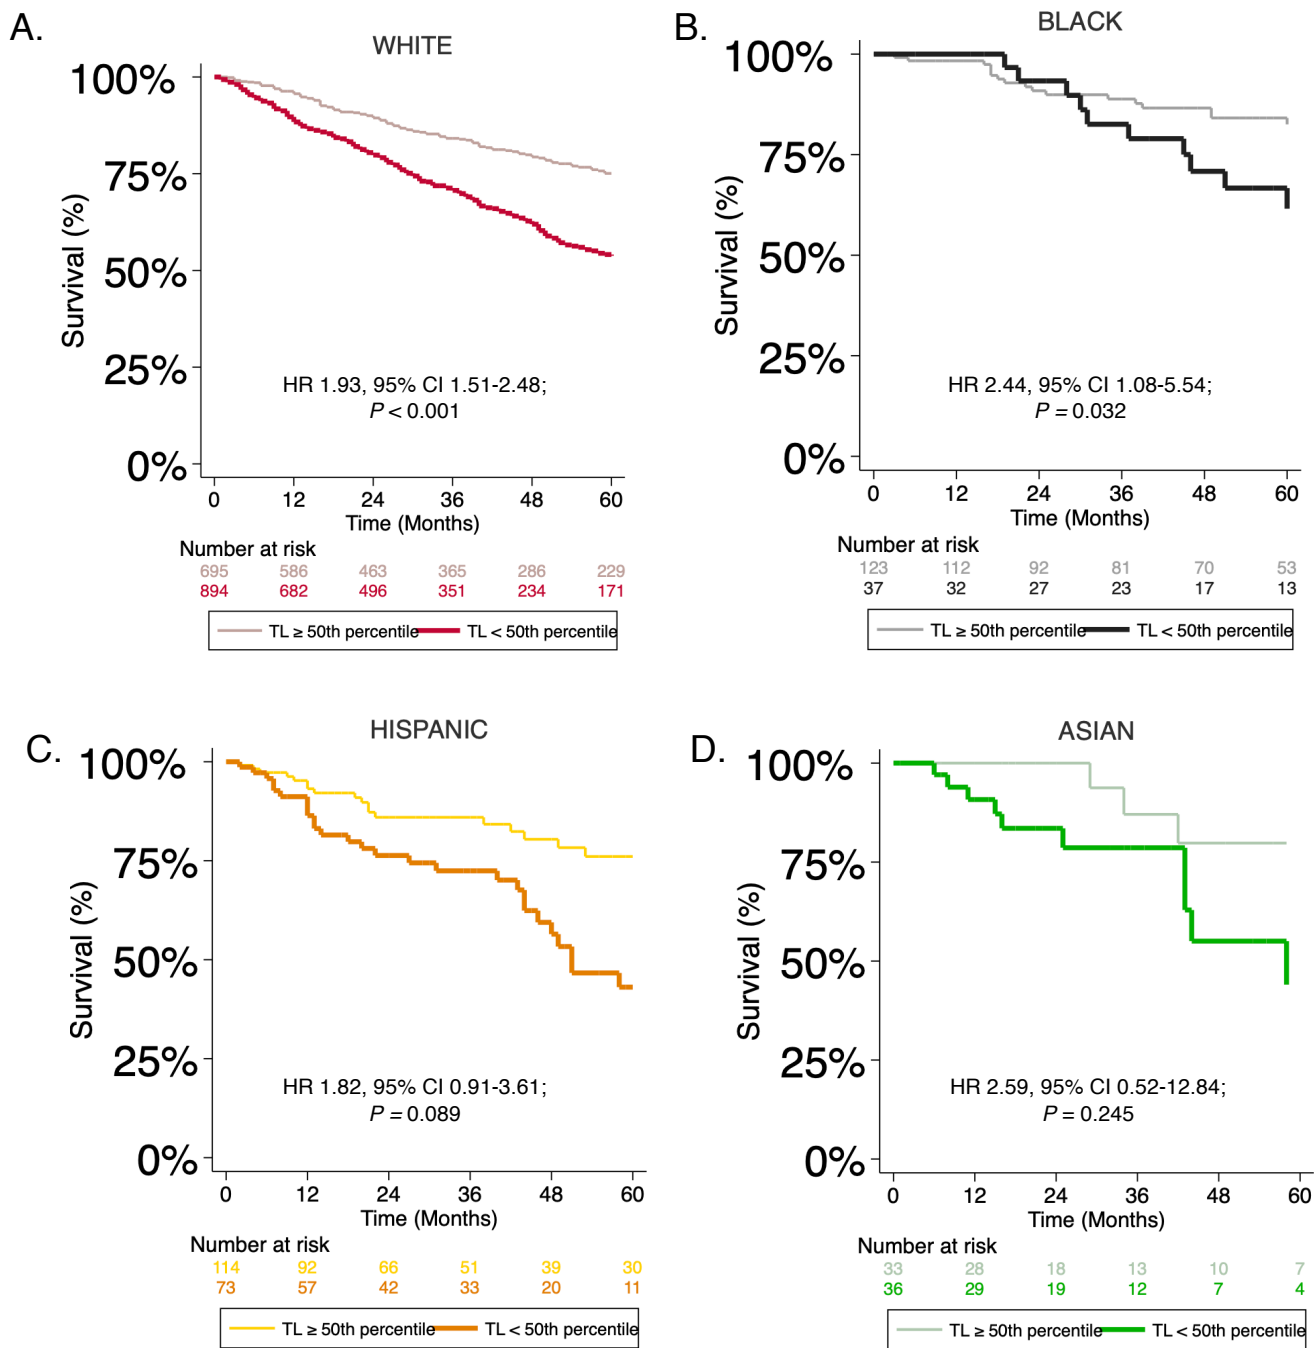

**Supplementary Figure 5.** Leukocyte Telomere Length (TL) below the 50<sup>th</sup> percentile consistently predicts worse survival across diverse racial groups with pulmonary fibrosis. Survival pattern by TL in (A) White subjects; (B) Black subjects; (C) Hispanic subjects; and (D) Asian subjects. Unadjusted Cox proportional hazard ratio (HR) and 95% confidence interval of this mortality hazard estimate depicted with its respective P-value for each racial/ethnic group.

**Supplementary Table 1.** Characteristics of Study Participants with Pulmonary Fibrosis

| Characteristics*                  | CHICAGO<br>(n=459) | CALIFORNIA<br>(n=658) | TEXAS<br>(n=670) | IPFNET<br>(n=259) | P-value# |
|-----------------------------------|--------------------|-----------------------|------------------|-------------------|----------|
| Age, years                        | 62.5 (11.8)        | 66.9 (11.3)           | 62.4 (11.6)      | 67.7 (7.8)        | < 0.001  |
| Male                              | 225 (49.0)         | 318 (48.3)            | 364 (54.3)       | 191 (73.8)        | < 0.001  |
| Race/Ethnicity                    |                    |                       |                  |                   |          |
| White                             | 332 (72.3)         | 517 (78.6)            | 528 (78.8)       | 236 (91.1)        | < 0.001  |
| Black                             | 84 (18.3)          | 21 (3.2)              | 55 (8.2)         | 2 (0.8)           | < 0.001  |
| Hispanic                          | 35 (7.6)           | 70 (10.6)             | 68 (10.2)        | 14 (5.4)          | 0.042    |
| Asian                             | 8 (1.7)            | 36 (5.5)              | 19 (2.8)         | 7 (2.7)           | 0.004    |
| Ever Smoker                       | 273 (60.0)         | 362 (55.1)            | 353 (52.7)       | 189 (73.0)        | < 0.001  |
| Lung Function                     |                    |                       |                  |                   |          |
| FVC (% predicted)                 | 64.2 (18.5)        | 69.6 (19.6)           | 66.5 (19.9)      | 66.3 (16.9)       | < 0.001  |
| DL <sub>CO</sub> (% predicted)    | 51.6 (20.9)        | 49.5 (18.7)           | 45.3 (18.9)      | 40.7 (13.0)       | < 0.001  |
| ILD sub-category                  |                    |                       |                  |                   |          |
| IPF                               | 120 (26.1)         | 68 (10.3)             | 288 (43.0)       | 259 (100)         | < 0.001  |
| IPAF                              | 115 (25.1)         | 21 (3.2)              | 71 (10.6)        | 0 (0)             | < 0.001  |
| CTD-ILD                           | 146 (31.8)         | 48 (7.3)              | 155 (23.1)       | 0 (0)             | < 0.001  |
| FHP                               | 77 (16.8)          | 261 (39.7)            | 84 (12.5)        | 0 (0)             | < 0.001  |
| Unclassifiable/Others             | 1 (0.2)            | 260 (39.5)            | 72 (10.8)        | 0 (0)             | <0.001   |
| Mean survival time, mths (95% CI) | 102 (94 -110)      | 99 (91-107)           | 101 (90-113)     | 72 (70-75)        | < 0.001  |
| Number of deaths, n (%)           | 129 (28.4)         | 154 (23.4)            | 288 (43.0)       | 26 (10.0)         | < 0.001  |
| Lung transplantation, n (%)       | 32 (7.0)           | 17 (2.6)              | 125 (18.7)       | 5 (1.9)           | < 0.001  |

Total sample size, n=2,042. \*Categorical variables presented as n (%); continuous variables presented as means (SD). #P-value for chi-squared (categorical data) or one-way ANOVA (continuous data) comparing the CHICAGO, CALIFORNIA, TEXAS, and IPFNET cohorts. Exception for participants; smoking status, n=2041; FVC=forced vital capacity, n=2015; DL<sub>CO</sub>=diffusing capacity of the lungs, n=1959; ILD=interstitial lung disease; IPF=Idiopathic pulmonary fibrosis, n=735; IPAF=interstitial pneumonia with autoimmune features, n=207; CTD-ILD=Connective tissue disease associated-ILD, n=349; FHP=Fibrotic hypersensitivity pneumonitis, n=422; Unclassifiable/Others, n=333.

**Supplementary Table 2.** Mean Age and Telomere Lengths Differences Between White and Black Subjects

| Characteristic    | WHITE<br>(n=1613) | BLACK<br>(n=162) | Absolute Mean<br>Difference ( $\Delta$ ) | Delta ratio (95% CI) | P-value <sup>#</sup> |
|-------------------|-------------------|------------------|------------------------------------------|----------------------|----------------------|
| <i>Mean TL*</i>   |                   |                  |                                          |                      |                      |
| PF cohort         | -0.06 (0.47)      | 0.37 (0.49)      | 0.43 (0.48)                              | 3.58 (2.56 – 5.37)   | < 0.001              |
| HRS cohort        | -0.04 (0.49)      | 0.08 (0.48)      | 0.12 (0.48)                              |                      |                      |
| <i>Age, years</i> |                   |                  |                                          |                      |                      |
| PF cohort         | 66.02 (10.40)     | 54.93 (12.20)    | 11.09 (36.74)                            | 4.70 (3.37 – 7.17)   | < 0.001              |
| HRS cohort        | 70.19 (10.23)     | 67.83 (9.90)     | 2.36 (28.27)                             |                      |                      |

\*Standardized mean observed minus expected (O–E) leukocyte telomere length (TL) across study population presented as means (SD).

<sup>#</sup>P-value for the student's T-test comparing  $\Delta$  between PF and HRS cohorts. PF=pulmonary fibrosis; HRS=Health Retirement Survey.

**Supplementary Table 3.** Comparison of Mean Leukocyte Telomere Lengths Depicting Similarities Across Study Participants with Pulmonary Fibrosis Stratified by Race

| Characteristics* | CHICAGO<br>(n=459) | CALIFORNIA<br>(n=658) | TEXAS<br>(n=670) | IPFNET<br>(n=259) | P-value# |
|------------------|--------------------|-----------------------|------------------|-------------------|----------|
| White            |                    |                       |                  |                   |          |
| Q1 (n=435)       | -0.64 (0.29)       | -0.66 (0.32)          | -0.62 (0.27)     | -0.61 (0.32)      | 0.660    |
| Q2 (n=426)       | -0.14 (0.10)       | -0.14 (0.09)          | -0.15 (0.10)     | -0.13 (0.09)      | 0.456    |
| Q3 (n=386)       | 0.16 (0.09)        | 0.17 (0.09)           | 0.16 (0.08)      | 0.13 (0.07)       | 0.012    |
| Q4 (n=345)       | 0.55 (0.23)        | 0.59 (0.22)           | 0.60 (0.25)      | 0.61 (0.31)       | 0.590    |
| Black            |                    |                       |                  |                   |          |
| Q1 (n=16)        | -0.60 (0.15)       | -0.44 (0.01)          | -0.46 (0.05)     | ---               | 0.117    |
| Q2 (n=25)        | -0.11 (0.12)       | -0.15 (0.14)          | -0.13 (0.06)     | -0.17 (0.00)      | 0.875    |
| Q3 (n=44)        | 0.16 (0.07)        | 0.17 (0.07)           | 0.17 (0.09)      | ---               | 0.954    |
| Q4 (n=77)        | 0.65 (0.24)        | 0.69 (0.30)           | 0.64 (0.27)      | 1.28 (0.00)       | 0.127    |
| Hispanic         |                    |                       |                  |                   |          |
| Q1 (n=38)        | -0.77 (0.43)       | -0.57 (0.25)          | -0.64 (0.38)     | -0.71 (0.16)      | 0.557    |
| Q2 (n=38)        | -0.09 (0.09)       | -0.11 (0.09)          | -0.13 (0.10)     | -0.15 (0.11)      | 0.786    |
| Q3 (n=50)        | 0.21 (0.07)        | 0.18 (0.11)           | 0.18 (0.09)      | 0.23 (0.04)       | 0.704    |
| Q4 (n=61)        | 0.76 (0.29)        | 0.66 (0.24)           | 0.64 (0.30)      | 0.63 (0.15)       | 0.601    |
| Asian            |                    |                       |                  |                   |          |
| Q1 (n=13)        | -0.64 (0.00)       | -0.60 (0.31)          | -0.81 (0.09)     | -0.50 (0.00)      | 0.577    |
| Q2 (n=14)        | ---                | -0.13 (0.11)          | -0.14 (0.11)     | -0.27 (0.00)      | 0.511    |
| Q3 (n=21)        | 0.18 (0.07)        | 0.15 (0.08)           | 0.17 (0.10)      | 0.16 (0.00)       | 0.922    |
| Q4 (n=22)        | 0.52 (0.18)        | 0.74 (0.32)           | 0.73 (0.16)      | 0.45 (0.21)       | 0.246    |

Total sample size, n=1,065. \*Standardized telomere length across study population presented as means (SD) and categorized by quartiles, Q1=1<sup>st</sup> quartile, Q2=2<sup>nd</sup> quartile, Q3=3<sup>rd</sup> quartile, Q4=4<sup>th</sup> quartile. Telomere lengths unadjusted for age or sex.

#P-value for ANOVA comparisons between the CHICAGO, CALIFORNIA, TEXAS, and IPFNET cohorts. White n=784, Black n=102; Hispanic n=104; Asian n=42; Other race (not depicted) n=14.

**Supplementary Table 4.** Differences in Telomere Lengths Stratified by Race and Sex\*

| Characteristics   | WHITE           | BLACK          | HISPANIC       | ASIAN         | P-value <sup>#</sup> |
|-------------------|-----------------|----------------|----------------|---------------|----------------------|
| <b>CHICAGO</b>    | <b>(n=332)</b>  | <b>(n=84)</b>  | <b>(n=35)</b>  | <b>(n=8)</b>  |                      |
| All subjects      | -0.09 (0.47)    | 0.29 (0.45)    | 0.14 (0.62)    | 0.16 (0.37)   | <0.001               |
| Male              | -0.14 (0.46)    | 0.13 (0.53)    | 0.07 (0.34)    | 0.03 (0.46)   | 0.032                |
| Female            | -0.03 (0.47)    | 0.35 (0.41)    | 0.18 (0.73)    | 0.30 (0.24)   | <0.001               |
| <b>CALIFORNIA</b> | <b>(n=517)</b>  | <b>(n=21)</b>  | <b>(n=70)</b>  | <b>(n=36)</b> |                      |
| All subjects      | -0.03 (0.50)    | 0.20 (0.40)    | 0.07 (0.50)    | 0.10 (0.53)   | 0.115                |
| Male              | -0.07 (0.49)    | 0.03 (0.36)    | 0.04 (0.57)    | -0.14 (0.50)  | 0.748                |
| Female            | 0.02 (0.51)     | 0.29 (0.41)    | 0.08 (0.45)    | 0.40 (0.40)   | 0.015                |
| <b>TEXAS</b>      | <b>(n=528)</b>  | <b>(n=55)</b>  | <b>(n=68)</b>  | <b>(n=19)</b> |                      |
| All subjects      | -0.05 (0.49)    | 0.30 (0.45)    | 0.15 (0.50)    | 0.08 (0.59)   | <0.001               |
| Male              | -0.08 (0.47)    | 0.07 (0.37)    | 0.05 (0.49)    | 0.01 (0.56)   | 0.269                |
| Female            | -0.02 (0.51)    | 0.37 (0.45)    | 0.32 (0.49)    | 0.15 (0.64)   | <0.001               |
| <b>IPFNET</b>     | <b>(n=236)</b>  | <b>(n=2)</b>   | <b>(n=14)</b>  | <b>(n=7)</b>  |                      |
| All subjects      | -0.02 (0.49)    | 0.55 (1.02)    | 0.12 (0.56)    | 0.17 (0.43)   | 0.228                |
| Male              | -0.03 (0.43)    | 0.55 (1.02)    | 0.11 (0.54)    | 0.07 (0.44)   | 0.246                |
| Female            | 0.01 (0.64)     | ---            | 0.14 (0.63)    | 0.43 (0.38)   | 0.616                |
| <b>COMBINED</b>   | <b>(n=1613)</b> | <b>(n=162)</b> | <b>(n=187)</b> | <b>(n=70)</b> |                      |
| All subjects      | -0.05 (0.49)    | 0.29 (0.45)    | 0.11 (0.52)    | 0.11 (0.51)   | <0.001               |
| Male              | -0.08 (0.47)    | 0.12 (0.48)    | 0.05 (0.50)    | -0.06 (0.49)  | 0.012                |
| Female            | 0.00 (0.51)     | 0.35 (0.42)    | 0.17 (0.55)    | 0.31 (0.46)   | <0.001               |
| <b>HRS COHORT</b> | <b>(n=4319)</b> | <b>(n=779)</b> | <b>(n=614)</b> | <b>(n=96)</b> |                      |
| All subjects      | -0.03 (0.45)    | 0.13 (0.76)    | 0.02 (0.41)    | 0.01 (0.43)   | <0.001               |
| Male              | -0.02 (0.53)    | 0.11 (0.59)    | 0.02 (0.56)    | -0.03 (0.27)  | 0.001                |
| Female            | -0.03 (0.37)    | 0.14 (0.84)    | 0.02 (0.28)    | 0.03 (0.51)   | <0.001               |

Total sample size, n=7,854. \*Standardized telomere length across study population presented as means (SD). Telomere lengths unadjusted for age or sex. <sup>#</sup>P-value for ANOVA test comparing all four main racial groups. Patients with mixed or other racial ancestry not depicted above, n=14.

**Supplementary Table 5.** Demographics of Pulmonary Fibrosis (PF) cases stratified by subtype

| Characteristics*               | IPF            | IPAF           | CTD-ILD        | FHP            | Unclassifiable /Others | P-value# |
|--------------------------------|----------------|----------------|----------------|----------------|------------------------|----------|
| <b>PF (n=2046)</b>             | <b>(n=735)</b> | <b>(n=207)</b> | <b>(n=349)</b> | <b>(n=422)</b> | <b>(n=333)</b>         |          |
| Age, years                     | 68.2 (8.5)     | 62.3 (11.1)    | 56.4 (13.1)    | 64.4 (10.4)    | 66.6 (11.8)            | <0.001   |
| Male                           | 543 (73.9)     | 97 (46.9)      | 97 (27.8)      | 184 (43.6)     | 177 (53.2)             | <0.001   |
| Ever Smoker                    | 508 (69.5)     | 113 (54.6)     | 145 (41.6)     | 207 (49.1)     | 204 (61.5)             | <0.001   |
| Body Mass Index                | 29.0 (5.2)     | 30.4 (7.0)     | 28.4 (6.5)     | 29.5 (6.1)     | 29.4 (5.9)             | 0.003    |
| <b>Lung Function</b>           |                |                |                |                |                        |          |
| FVC (% predicted)              | 67.3 (18.4)    | 63.9 (19.0)    | 66.6 (19.5)    | 66.1 (18.9)    | 69.7 (21.1)            | 0.012    |
| FEV <sub>1</sub> (% predicted) | 75.0 (19.7)    | 71.3 (20.4)    | 70.2 (20.6)    | 68.9 (19.9)    | 71.0 (21.3)            | 0.003    |
| DL <sub>CO</sub> (% predicted) | 45.0 (17.6)    | 47.0 (18.0)    | 49.5 (20.6)    | 49.6 (19.2)    | 48.4 (19.8)            | <0.001   |

\*Categorical variables presented as n (%); continuous variables presented as means (SD). #P-value for chi-squared (categorical data) or one-way ANOVA (continuous data) comparing all four major PF subtypes. Exception for participants with: smoking status, n=2041; Body mass index=1505; FVC=forced vital capacity, n=2015; FEV<sub>1</sub>=forced expiratory volume in 1<sup>st</sup> second, n=1254; DL<sub>CO</sub>=diffusing capacity of the lungs, n=1959. ILD=interstitial lung disease; IPF=idiopathic pulmonary fibrosis, n=735; IPAF=interstitial pneumonia with autoimmune features, n=207; CTD-ILD=connective tissue disease associated-ILD, n=349; fHP=fibrotic hypersensitivity pneumonitis, n=422; unclassifiable/other ILD, n=333.

**Supplementary Table 6.** Differences in Telomere Lengths Stratified by Race and PF Subtype\*

| Characteristics       | WHITE                          | BLACK                        | HISPANIC                      | ASIAN                         | P-value <sup>#</sup> |
|-----------------------|--------------------------------|------------------------------|-------------------------------|-------------------------------|----------------------|
| IPF                   | <b>(n=653)</b><br>-0.11 (0.49) | <b>(n=13)</b><br>0.21 (0.52) | <b>(n=49)</b><br>0.05 (0.47)  | <b>(n=20)</b><br>-0.06 (0.53) | 0.018                |
| IPAF                  | <b>(n=153)</b><br>-0.04 (0.46) | <b>(n=30)</b><br>0.29 (0.39) | <b>(n=15)</b><br>-0.02 (0.71) | <b>(n=8)</b><br>0.25 (0.29)   | 0.003                |
| CTD-ILD               | <b>(n=200)</b><br>0.12 (0.46)  | <b>(n=89)</b><br>0.36 (0.38) | <b>(n=46)</b><br>0.32 (0.45)  | <b>(n=14)</b><br>0.43 (0.38)  | <0.001               |
| FHP                   | <b>(n=359)</b><br>-0.04 (0.51) | <b>(n=14)</b><br>0.05 (0.65) | <b>(n=34)</b><br>0.13 (0.46)  | <b>(n=11)</b><br>0.04 (0.64)  | 0.41                 |
| Unclassifiable/Others | <b>(n=248)</b><br>-0.03 (0.49) | <b>(n=16)</b><br>0.17 (0.56) | <b>(n=43)</b><br>-0.00 (0.58) | <b>(n=17)</b><br>0.02 (0.48)  | 0.65                 |

Total sample size, n=7,854. \*Standardized telomere length across study population presented as means (SD). Telomere lengths unadjusted for age or sex. <sup>#</sup>P-value for ANOVA test comparing all four main racial groups. Patients with mixed or other racial ancestry not depicted above, n=14. PF=Pulmonary fibrosis; ILD=interstitial lung disease; IPF=Idiopathic pulmonary fibrosis, n=735; IPAF=interstitial pneumonia with autoimmune features, n=206; CTD-ILD=Connective tissue disease associated-ILD, n=349; FHP=Fibrotic hypersensitivity pneumonitis, n=418; Unclassifiable/Others, n=324.

**Supplementary Table 7.** Generalized Model Assessing Age/Telomere Length Relationship Between PF and HRS Control Subjects Across Racial/Ethnic Categories

| <b>Cohort</b>   | <b>Beta coefficient</b> | <b>z</b> | <b>95% CI</b>      | <b>P-value</b> | <b>P-interaction*</b> |
|-----------------|-------------------------|----------|--------------------|----------------|-----------------------|
| <b>WHITE</b>    |                         |          |                    |                |                       |
| Age, years      | -0.048                  | -276.36  | -0.0485 to -0.0479 | < 0.001        | < 0.001               |
| PF              | -0.740                  | -32.91   | -0.7844 to -0.6963 | < 0.001        |                       |
| <b>BLACK</b>    |                         |          |                    |                |                       |
| Age, years      | -0.048                  | -187.33  | -0.0487 to -0.0477 | < 0.001        | < 0.001               |
| PF              | -0.885                  | -28.31   | -0.9462 to -0.8236 | < 0.001        |                       |
| <b>HISPANIC</b> |                         |          |                    |                |                       |
| Age, years      | -0.048                  | -118.17  | -0.0490 to -0.0474 | < 0.001        | < 0.001               |
| PF              | -0.842                  | -18.30   | -0.9317 to -0.7514 | < 0.001        |                       |
| <b>ASIAN</b>    |                         |          |                    |                |                       |
| Age, years      | -0.048                  | -36.68   | -0.0509 to -0.0457 | < 0.001        | < 0.001               |
| PF              | -0.678                  | -5.48    | -0.9206 to -0.4353 | < 0.001        |                       |

*PF=pulmonary fibrosis; HRS=Health Retirement Survey. White n=5,932, Black n=941, Hispanic n=801, Asian n=166, others n=14, All patients n=7854. Statistical test: generalized linear regression model assessing the age/telomere length relationship across racial/ethnic groups with P-value, beta coefficient, z-score, 95% confidence interval, and P-value for interaction (P-interaction) between PF and controls in the age/LTL relationship assessed and reported for each racial/ethnic group.*

**Supplementary Table 8.** Stratification by Age Group Demonstrates Shorter Mean and Median Leukocyte Telomere Length with Increasing Chronological Age among Pulmonary Fibrosis Cohorts and Control Subjects.

| <b>Characteristics*</b>   | <b>Mean Telomere Length (SD)</b> | <b>Median Telomere Length (IQR)</b> |
|---------------------------|----------------------------------|-------------------------------------|
| <b>CHICAGO (n=459)</b>    |                                  |                                     |
| Less than 40yrs (n=19)    | 0.59 (0.40)                      | 0.66 (0.63)                         |
| 40 – 49yrs (n=46)         | 0.30 (0.40)                      | 0.20 (0.50)                         |
| 50 – 59yrs (n=101)        | 0.11 (0.47)                      | 0.14 (0.44)                         |
| 60 – 69yrs (n=158)        | -0.06 (0.48)                     | -0.02 (0.63)                        |
| 70yrs or older (n=135)    | -0.20 (0.46)                     | -0.22 (0.54)                        |
| <b>CALIFORNIA (n=658)</b> |                                  |                                     |
| Less than 40yrs (n=12)    | 0.52 (0.34)                      | 0.45 (0.66)                         |
| 40 – 49yrs (n=45)         | 0.19 (0.57)                      | 0.17 (0.53)                         |
| 50 – 59yrs (n=91)         | 0.04 (0.50)                      | 0.12 (0.57)                         |
| 60 – 69yrs (n=215)        | 0.01 (0.47)                      | 0.06 (0.60)                         |
| 70yrs or older (n=295)    | -0.07 (0.50)                     | -0.10 (0.65)                        |
| <b>TEXAS (n=670)</b>      |                                  |                                     |
| Less than 40yrs (n=31)    | 0.37 (0.58)                      | 0.42 (0.69)                         |
| 40 – 49yrs (n=61)         | 0.32 (0.45)                      | 0.39 (0.49)                         |
| 50 – 59yrs (n=148)        | 0.06 (0.49)                      | 0.11 (0.62)                         |
| 60 – 69yrs (n=240)        | -0.05 (0.49)                     | -0.03 (0.59)                        |
| 70yrs or older (n=190)    | -0.15 (0.45)                     | -0.17 (0.61)                        |
| <b>IPFNET (n=259)</b>     |                                  |                                     |
| Less than 40yrs (n=0)     | ---                              | ---                                 |
| 40 – 49yrs (n=3)          | 0.52 (0.72)                      | 0.88 (1.30)                         |
| 50 – 59yrs (n=37)         | -0.05 (0.67)                     | -0.00 (0.68)                        |
| 60 – 69yrs (n=114)        | -0.01 (0.50)                     | 0.03 (0.51)                         |
| 70yrs or older (n=105)    | 0.02 (0.42)                      | 0.02 (0.55)                         |
| <b>HRS (n=5808)</b>       |                                  |                                     |
| Less than 40yrs (n=14)    | 0.02 (0.19)                      | -0.01 (0.21)                        |
| 40 – 49yrs (n=93)         | 0.05 (0.27)                      | 0.02 (0.25)                         |
| 50 – 59yrs (n=1056)       | 0.04 (0.43)                      | -0.02 (0.26)                        |
| 60 – 69yrs (n=1766)       | 0.01 (0.46)                      | -0.06 (0.26)                        |
| 70yrs or older (n=2879)   | -0.02 (0.55)                     | -0.09 (0.25)                        |

Total sample size, n=7,854. \*Standardized telomere length across study population presented as means (SD). Telomere lengths unadjusted for age or sex.

**Supplementary Table 9.** Models depicting association of leukocyte telomere length (LTL) with age stratified by sex across diverse racial populations.

| Characteristics                   | WHITE                      | BLACK                      | HISPANIC       | ASIAN                      | COMBINED       |
|-----------------------------------|----------------------------|----------------------------|----------------|----------------------------|----------------|
| <b>Regression Models for Age*</b> |                            |                            |                |                            |                |
| <b>Unadjusted LTL</b>             |                            |                            |                |                            |                |
| <i>PF Cohort</i>                  | (n=1613)                   | (n=162)                    | (n=187)        | (n=70)                     | (n=2046)       |
| Male, <i>R</i> (Root MSE)         | -0.18 (0.26)               | -0.30 (0.22)               | -0.37 (0.25)   | -0.24 (0.29)               | -0.22 (0.26)   |
| 95% CI                            | -0.25 to -0.12             | -0.55 to 0.01 <sup>+</sup> | -0.54 to -0.18 | -0.53 to 0.09 <sup>+</sup> | -0.28 to -0.16 |
| Female, <i>R</i> (Root MSE)       | -0.22 (0.29)               | -0.28 (0.24)               | -0.37 (0.30)   | -0.42 (0.27)               | -0.32 (0.29)   |
| 95% CI                            | -0.29 to -0.15             | -0.44 to -0.10             | -0.53 to -0.18 | -0.69 to -0.06             | -0.37 to -0.26 |
| All, <i>R</i> (Root MSE)          | -0.21 (0.27)               | -0.29 (0.24)               | -0.39 (0.28)   | -0.17 (0.29)               | -0.30 (0.28)   |
| 95% CI                            | -0.26 to -0.17             | -0.43 to -0.14             | -0.51 to -0.26 | -0.40 to 0.07 <sup>+</sup> | -0.33 to -0.26 |
| <i>HRS Cohort</i>                 | (n=4319)                   | (n=779)                    | (n=614)        | (n=96)                     | (n=5808)       |
| Male, <i>R</i> (Root MSE)         | -0.03 (0.78)               | 0.03 (0.86)                | -0.12 (0.81)   | -0.29 (0.38)               | -0.04 (0.79)   |
| 95% CI                            | -0.08 to 0.01 <sup>+</sup> | -0.09 to 0.15 <sup>+</sup> | -0.23 to -0.02 | -0.56 to 0.02 <sup>+</sup> | -0.08 to -0.00 |
| Female, <i>R</i> (Root MSE)       | -0.05 (0.55)               | -0.04 (1.23)               | -0.16 (0.40)   | -0.01 (0.76)               | -0.06 (0.68)   |
| 95% CI                            | -0.10 to -0.01             | -0.13 to 0.05 <sup>+</sup> | -0.26 to -0.06 | -0.25 to 0.27 <sup>+</sup> | -0.10 to -0.03 |
| All, <i>R</i> (Root MSE)          | -0.04 (0.65)               | -0.02 (1.11)               | -0.12 (0.59)   | -0.07 (0.63)               | -0.05 (0.73)   |
| 95% CI                            | -0.07 to -0.01             | -0.10 to -0.05             | -0.42 to -0.05 | -0.26 to -0.14             | -0.08 to -0.03 |
| <b>Standardized LTL**</b>         |                            |                            |                |                            |                |
| <i>PF Cohort</i>                  | (n=1613)                   | (n=162)                    | (n=187)        | (n=70)                     | (n=2046)       |
| Male, <i>R</i> (Root MSE)         | -0.17 (1.08)               | -0.37 (1.08)               | -0.35 (1.06)   | -0.17 (1.09)               | -0.21 (1.08)   |
| 95% CI                            | -0.24 to -0.11             | -0.60 to -0.08             | -0.52 to -0.16 | -0.15 to 0.47 <sup>+</sup> | -0.26 to -0.15 |
| Female, <i>R</i> (Root MSE)       | -0.26 (1.07)               | -0.30 (0.88)               | -0.26 (1.09)   | -0.26 (0.95)               | -0.31 (1.06)   |
| 95% CI                            | -0.32 to -0.19             | -0.45 to -0.12             | -0.44 to -0.06 | -0.57 to 0.10 <sup>+</sup> | -0.37 to -0.25 |
| All, <i>R</i> (Root MSE)          | -0.22 (1.08)               | -0.33 (0.96)               | -0.31 (1.07)   | -0.14 (1.10)               | -0.28 (1.08)   |
| 95% CI                            | -0.27 to -0.17             | -0.46 to -0.18             | -0.44 to -0.18 | -0.36 to 0.10 <sup>+</sup> | -0.32 to -0.24 |
| <i>HRS Cohort</i>                 | (n=4319)                   | (n=779)                    | (n=614)        | (n=96)                     | (n=5808)       |
| Male, <i>R</i> (Root MSE)         | -0.12 (1.10)               | -0.09 (1.13)               | -0.31 (1.13)   | -0.39 (1.06)               | -0.15 (1.11)   |
| 95% CI                            | -0.16 to -0.07             | -0.21 to 0.02 <sup>+</sup> | -0.42 to -0.19 | -0.63 to -0.09             | -0.19 to -0.11 |
| Female, <i>R</i> (Root MSE)       | -0.14 (1.08)               | -0.18 (1.08)               | -0.26 (1.06)   | -0.31 (1.12)               | -0.18 (1.09)   |
| 95% CI                            | -0.18 to -0.10             | -0.27 to -0.10             | -0.36 to -0.17 | -0.53 to -0.06             | -0.21 to -0.14 |
| All, <i>R</i> (Root MSE)          | -0.13 (1.09)               | -0.15 (1.10)               | -0.29 (1.09)   | -0.35 (1.09)               | -0.17 (1.10)   |
| 95% CI                            | -0.16 to -0.10             | -0.22 to -0.09             | -0.36 to -0.21 | -0.51 to -0.16             | -0.19 to -0.14 |

*R*= Pearson's bivariate correlation coefficient. Root MSE=Root mean squared error. PF= pulmonary fibrosis.  
<sup>+</sup>*P*<0.001 for all regression models except where denoted by <sup>+</sup>. <sup>\*\*</sup>Standardized telomere lengths in quartiles.

**Supplementary Table 10.** Stratification by ILD-GAP Score Demonstrates Shorter Mean and Median Leukocyte Telomere Length with Increasing Pulmonary Fibrosis Severity Across Racial/Ethnic groups.

| <b>Characteristics*</b> | <b>Mean Telomere Length (SD)</b> | <b>Median Telomere Length (IQR)</b> |
|-------------------------|----------------------------------|-------------------------------------|
| <b>WHITE (n=1613)</b>   |                                  |                                     |
| 0-1                     | 0.04 (0.51)                      | 0.10 (0.63)                         |
| 2-3                     | -0.03 (0.50)                     | -0.01 (0.63)                        |
| 4-5                     | -0.11 (0.46)                     | -0.06 (0.59)                        |
| >5                      | -0.18 (0.44)                     | -0.20 (0.55)                        |
| <b>BLACK (n=162)</b>    |                                  |                                     |
| 0-1                     | 0.38 (0.39)                      | 0.38 (0.54)                         |
| 2-3                     | 0.26 (0.46)                      | 0.26 (0.57)                         |
| 4-5                     | 0.17 (0.56)                      | 0.13 (0.71)                         |
| >5                      | -0.18 (0.27)                     | -0.21 (0.24)                        |
| <b>HISPANIC (n=187)</b> |                                  |                                     |
| 0-1                     | 0.21 (0.50)                      | 0.20 (0.53)                         |
| 2-3                     | 0.12 (0.51)                      | 0.19 (0.73)                         |
| 4-5                     | -0.03 (0.60)                     | 0.02 (0.84)                         |
| >5                      | 0.01 (0.37)                      | -0.15 (0.50)                        |
| <b>ASIAN (n=70)</b>     |                                  |                                     |
| 0-1                     | 0.16 (0.61)                      | 0.16 (1.13)                         |
| 2-3                     | 0.24 (0.54)                      | 0.21 (0.61)                         |
| 4-5                     | 0.10 (0.30)                      | 0.11 (0.34)                         |
| >5                      | -0.16 (0.52)                     | -0.17 (0.58)                        |

*\*Standardized telomere length across study population presented as means (SD). Telomere lengths unadjusted for age or sex. Exception for participants without available components for ILD-GAP score estimation (White n=99, Black n=22, Hispanic n=15, Asian n=3). ILD-GAP=interstitial lung disease, gender, age, physiology [FVC=forced vital capacity, DL<sub>CO</sub>=diffusing capacity of the lungs] score.*
